# Supplementary material
Source: PubMed Central journal article supplement (PMC2815897)
Supplement: pp.109.148908_1.pdf [file pp.109.148908_1.pdf]

Ogiso et al.

Supplemental data

This section contains the legends to Supplementary Figures 1 to 10, and Supplemental Tables 1 to 4

### Supplemental figures

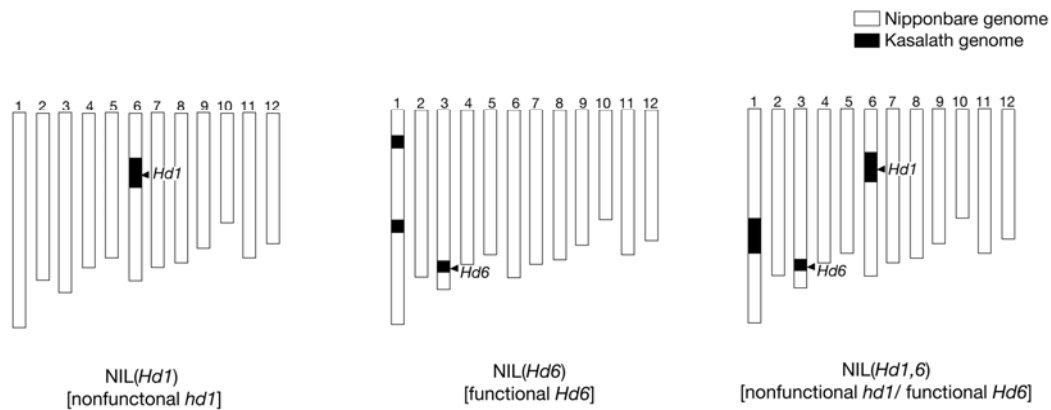

**Figure S1. Graphical genotypes of NILs.**

Black and white regions represent segments of the 12 chromosomes derived from Kasalath and Nipponbare, respectively. The Kasalath allele of *Hd6* is functional in NIL(*Hd6*) and NIL(*Hd1,6*). The Nipponbare allele of *Hd1* is functional in NIL(*Hd6*) and Nipponbare. DNA markers for selection of Kasalath fragments for the *Hd1* and *Hd6* regions were R2171 to R2654 and R2311 to C217, respectively.

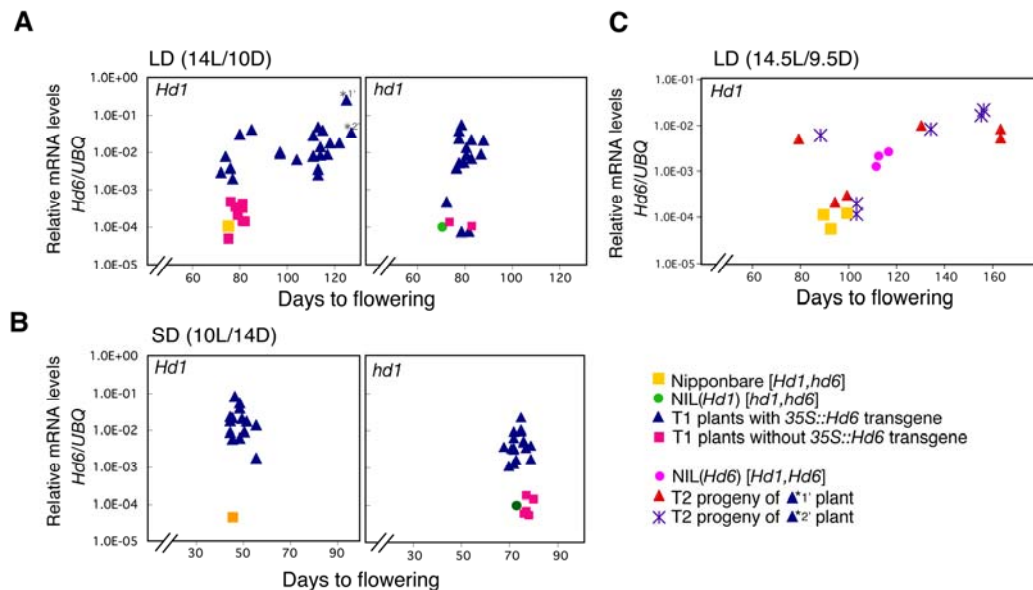

**Figure S2. Functional *Hd1* gene is necessary for the late flowering observed in *Hd6*-overexpressing lines under LD conditions.**

(A–C) Flowering time (x-axis) vs. *Hd6/UBQ* expression levels (y-axis) of transgenic lines in the T1 and T2 generations. Transgenic lines were generated in two genetic

backgrounds: Nipponbare (with a functional *Hd1* allele) and NIL(*Hd1*) (an NIL with a Kasalath *Hd1* allele [a non-functional *Hd1* allele]). T1 and control plants were grown under LD (A) and SD (B) conditions. *Hd6* dose-dependency of days to flowering was observed only with the functional *Hd1* allele. (C) Flowering times of T2 progeny plants from T1 plants (\*1, \*2) under LD conditions.

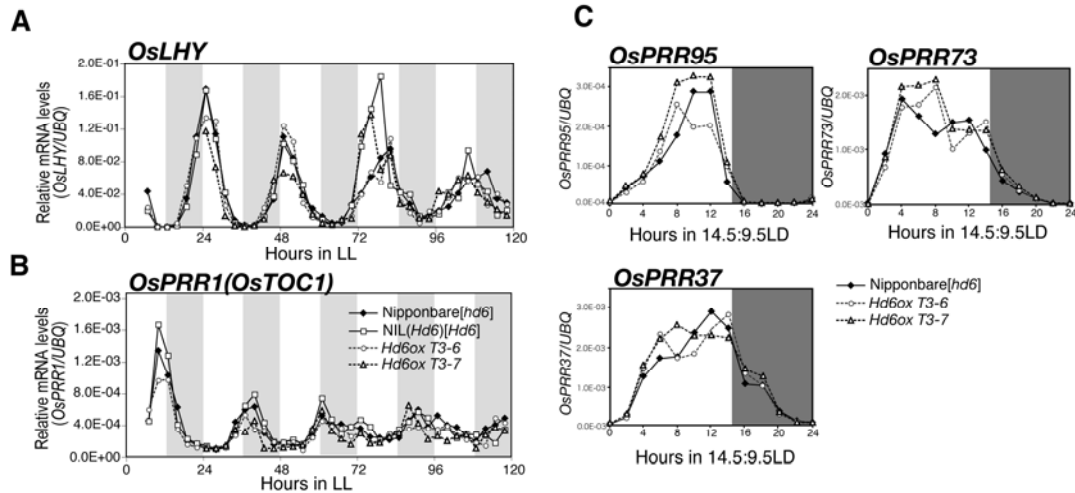

**Figure S3. *Hd6* ox does not affect the rhythms of clock-controlled gene expression in continuous light (LL).**

(A)(B) *OsLHY* (A) and *OsPRR1* (B) mRNA expression in Nipponbare [*Hd1*+/*hd6*-], NIL(*Hd6*) [*Hd1*+/*Hd6*+], and transgenic rice plants overexpressing *Hd6* cDNA [*Hd1*+/*Hd6ox*] was examined under LL conditions. Seedlings were grown under 12L/12D conditions for 10 days and then transferred to LL conditions; sample seedlings were collected every 3 h. Each point represents the average of three biological repeats. The values for each biological repeat consist of three repeated measurements. (C) *OsPRR 95, 73, and 37* mRNA expression in Nipponbare [*Hd1*+/*hd6*-] and in transgenic rice plants overexpressing *Hd6* cDNA [*Hd1*+/*Hd6ox*] was examined under LD conditions.

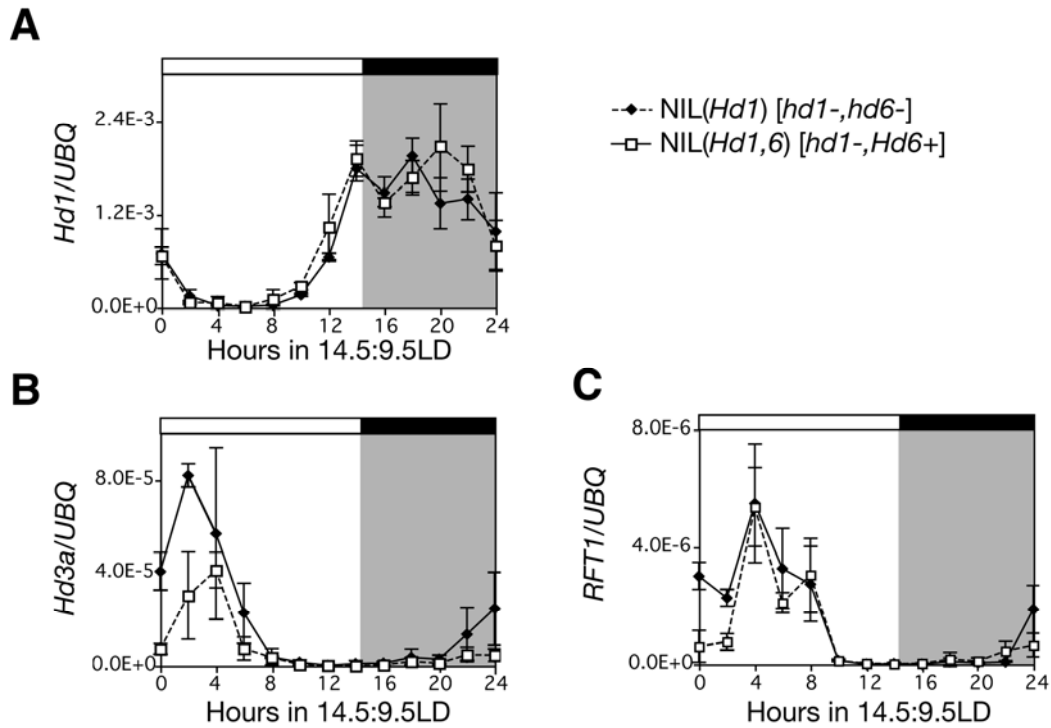

**Figure S4. *Hd6* does not repress *Hd3a* and *RFT1* critically in an *hd1* non-functional background.**

(A)–(C) Plants were grown under LD (14L/10D) conditions for 30 days. *Hd1* (A), *Hd3a* (B), and *RFT1* (C) mRNA expression is shown for NIL(*Hd6*) [*Hd1*+/*Hd6*+], and NIL(*Hd1,6*) [*hd1*-/*Hd6*+]. Each point represents the average of three biological repeats. Each average was obtained from three independent measurements. Error bars are S.D.

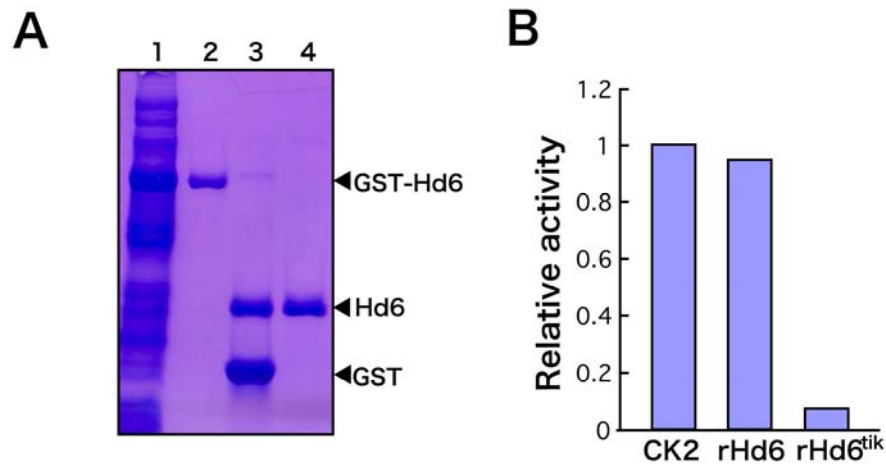

**Figure S5. Activity of purified recombinant Hd6 and Hd6<sup>tik</sup> proteins expressed in *E. coli***

(A) SDS-PAGE analysis of purified recombinant Hd6. The GST-fused Hd6 was expressed in *E. coli* and subjected to affinity purification using glutathione sepharose beads (lane 2). The beads were washed and subjected to thrombin cleavage as described (lane 3). The supernatant containing the purified protein was concentrated and analyzed (lane 4).

by SDS-PAGE (lane 4). Lane 1 shows the crude extract. (B) Recombinant Hd6 purified from *E. coli* had CK2 protein kinase activity, but recombinant Hd6<sup>tik</sup> had reduced activity. CK2 activity was determined by the incorporation of <sup>32</sup>P phosphate into the CK2 substrate peptide (RRRDDDSDDD) (Upstate Biotechnologies). Human CK2 alpha (Biaffin GMBH & CO KG) is normalized to 1.

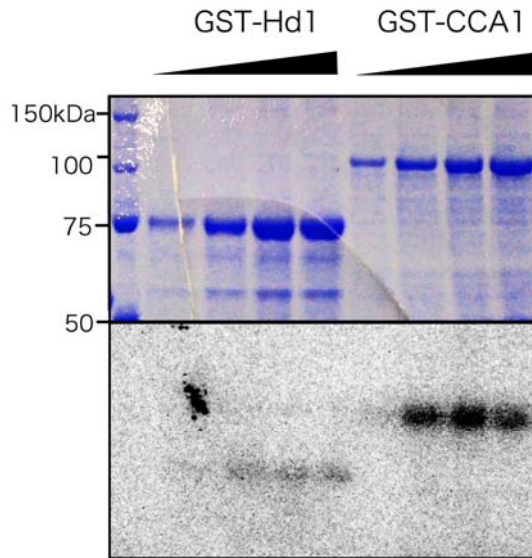

**Figure S6. CK2(Hd6) phosphorylation assay for Hd1.**

SDS-PAGE and autoradiographs of SDS-PAGE analysis of GST-Hd1 and GST-CCA1 after *in vitro* CK2(rHd6) phosphorylation assays. Hd1 protein was not a target substrate protein for Hd6 CK2 kinase *in vitro*.

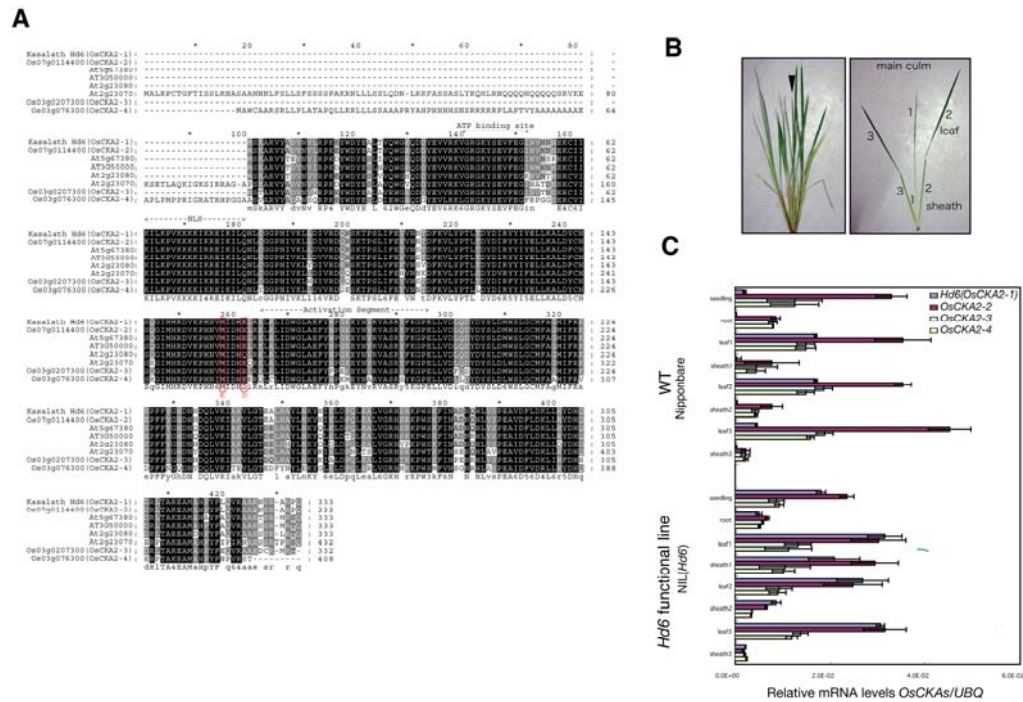

**Figure S7. CK2 $\alpha$  genes in rice.**

Protein sequence alignment of all of CK2 $\alpha$  subunit genes in rice and the Arabidopsis genome. Functional domains conserved in CK2 $\alpha$  are indicated by arrows: ATP binding site, basic stretch (NLS), catalytic loop and activation segment. For Hs6 (OsCKA1) the Kasalath functional allele is presented (accession no. BAB21591), since the reference Nipponbare genome contains the mutated Hs6 gene. Red boxes indicate timekeeper mutation points. (B) WT plant 40 days after germination, grown under LD conditions (14.5L/9.5D). Black arrow shows main culm. Right panel shows parts sampled for expression analysis in rice main culm. (C) Expression analysis of all four rice CK2 $\alpha$  genes (OsCKAs). Seedlings were grown in LD cycles. Samples for mRNA extraction were collected 10 days (whole plant and root) or 40 days (meristem, leaf, and leaf sheath) after sowing. Expression of OsCKAs was not detected in meristems. Expression was examined by TaqMan real-time RT-PCR (relative to ubiquitin expression). In Nipponbare, Hs6 mRNA expression was likely to have been reduced by non-sense-mediated mRNA decay.

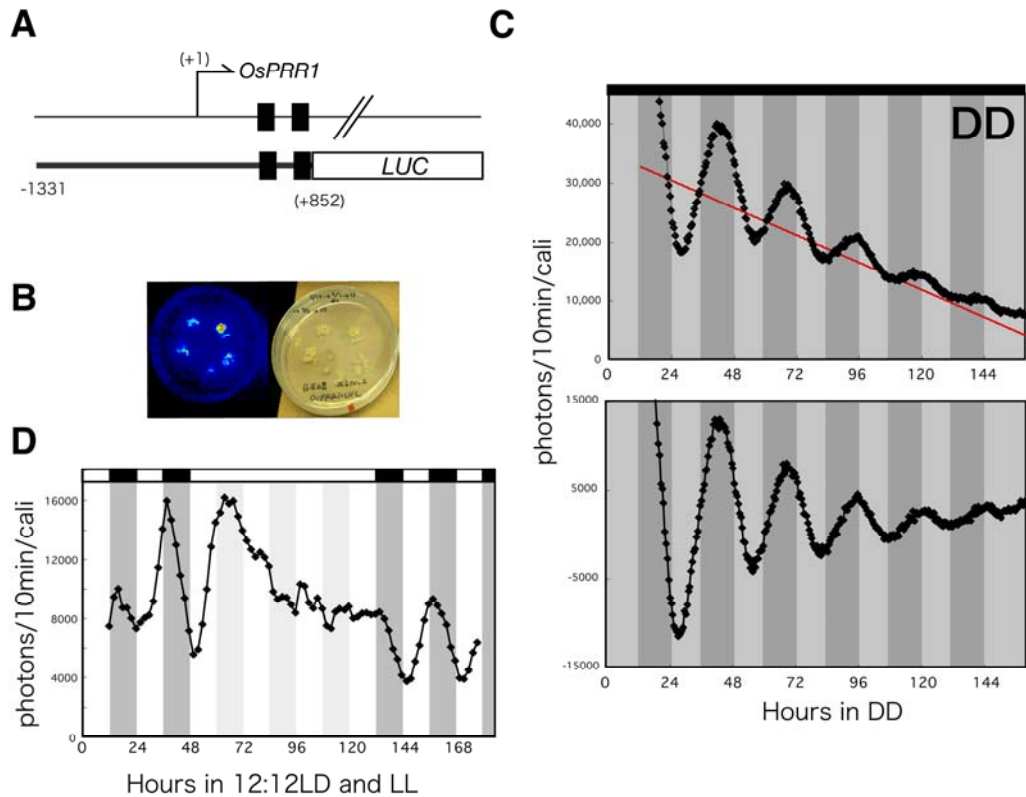

**Figure S8. Circadian clock monitoring by using *OsPRR1:luc* in rice cells.**

(A) Schematic of the construct used in this experiment. (B) Bioluminescent images of transformed rice calli. Transformed calli were deposited in a 3-cm Petri dish for bioluminescence measurement. (C) Calibration of rhythmic bioluminescence data. Raw bioluminescence data (top panel) were calibrated by simple subtraction after the addition of a line (in red); calibrated data are shown in the bottom panel. (D) Arrhythmic expression of *OsPRR1:luc* in LL. Rhythmic expression of *OsPRR1:luc* recovered in the LD cycles after LL treatment.



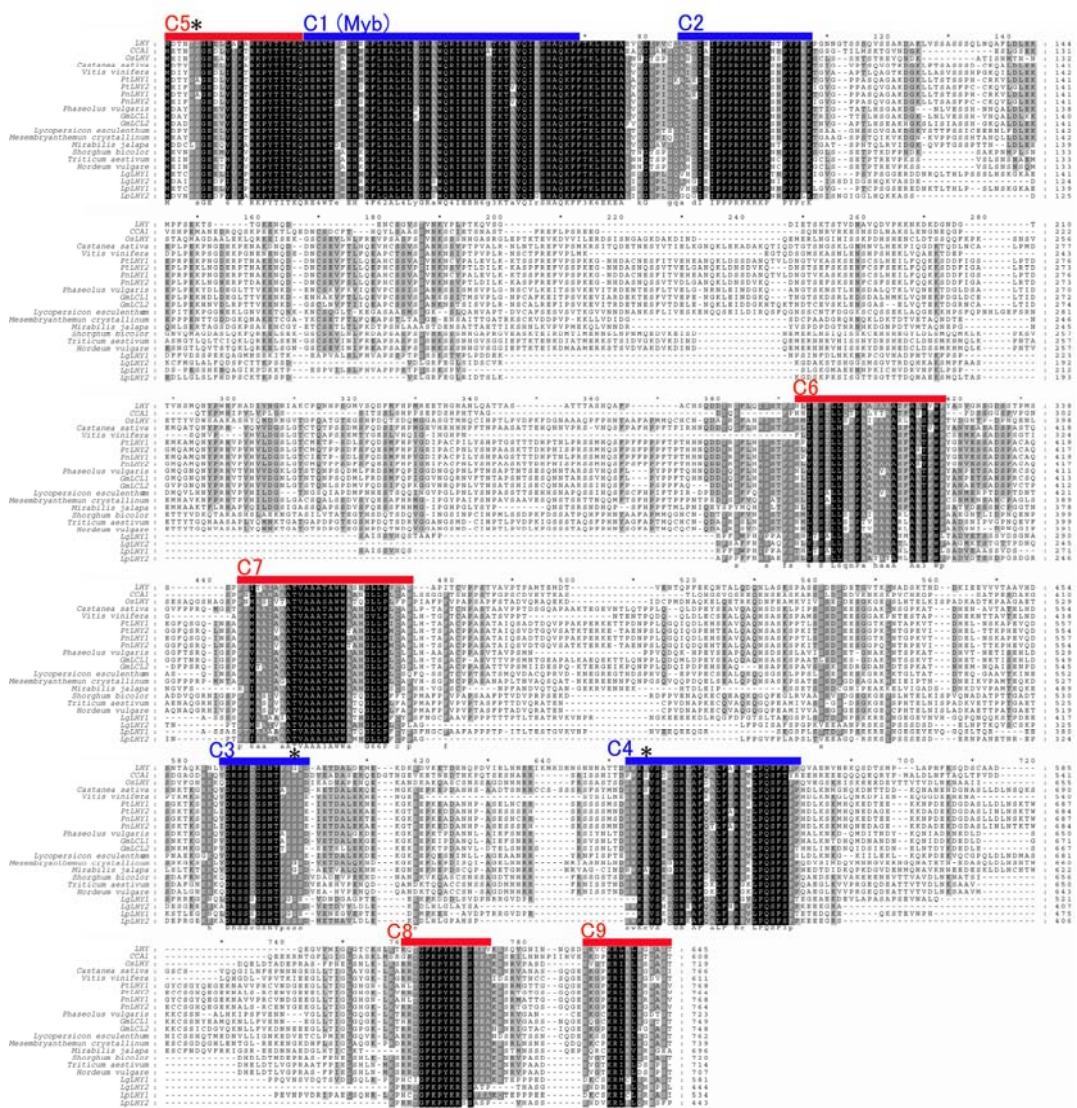

**Figure S9. Multiple alignment of LHY, CCA1, OsLHY, and LHY-like proteins.** (A) Species (clones) used in this alignment were *Arabidopsis thaliana* (LHY; At1g01060, CCA1; At2g46830), *Oryza sativa* (OsLHY; Os08g0157600), *Castanea sativa* (AAU20773), *Vitis vinifera* (GSVIVT00026185001), *Populus trichocarpa* (PtLHY1;NC\_008468, PtLHY2;NC\_008480), *Populus nigra* (PnLHY1;AB429410, PnLHY2;AB429411), *Phaseolus vulgaris* (CAD12767), *Glycine max* (GmLCL1;ABW87008, GmLCL2;ABW87009), *Lycopersicon esculentum* (BT012912), *Mesembryanthemum crystallinum* (AAQ73524.1), *Mirabilis jalapa* (ACL81163), *Sorghum bicolor* (Sb07g003870), *Triticum aestivum* (EST: dbj|CJ718789.1| CJ720523.1| CJ717710.1| CJ615885.1| CJ614670.1| CJ613519.1), *Hordeum vulgare* (EST : HO13M22S, AV933133, AV934889, AV937857, AV909868, AV941397), *Lemna gibba* (LgLHY1; BAD97870, LgLHY2;BAD97871), and *Lemna paucicostata* (LpLHY1; BAD97866, LpLHY2; BAD97867). Conserved (black), similar (grey) and non-conserved amino acid residues (white) were highlighted with GENEDOC software using amino acid sequences predicted from the full-length cDNA sequences in public

databases. Red bars indicate domains conserved in land plants (Okada et al., 2009). Blue bars indicate domains conserved named C5-C9 in angiosperms. Asterisks indicate CK2 phosphorylation sites in CCA1.

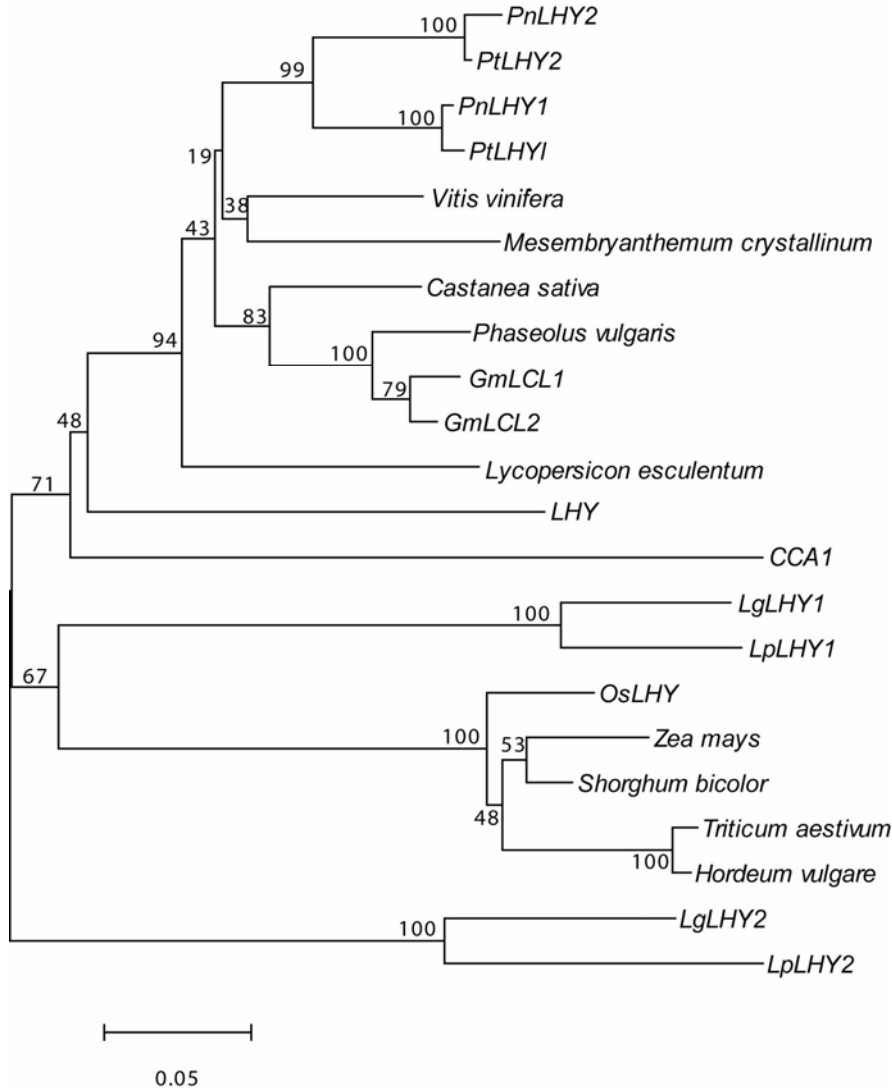

**Figure S10 Evolutionary relationships of 22 taxa in the angiosperm CCA1/LHY-like gene.**

Evolutionary history was inferred by using the neighbor-joining method [1]. The optimum tree with the sum of branch length = 2.01178381 is shown. The percentages of replicate trees in which the associated taxa were clustered together in the bootstrap test (1000 replicates) are shown next to the branches [2]. The tree is drawn to scale, with branch lengths in the same units as those of the evolutionary distances used to infer the phylogenetic tree. The evolutionary distances were computed by using the Poisson correction method [3] and are in units of the number of amino acid substitutions per site. The rate variation among sites was modeled with a gamma distribution (shape parameter = 2.25). All positions containing gaps and missing data were eliminated from the dataset (complete deletion option). There were a total of 274 positions (extracted



C1–5 domain) in the final dataset. Phylogenetic analyses were conducted in MEGA4 [4].

Supplementary Tables

**Supplementary Table 1 C1 to C9 domains and conserved CCA1 phosphorylation sites from LHY/CCA1-like proteins in angiosperms.**

| domain name | function                     | Sequence |
|-------------|------------------------------|----------|
| C1          | Myb domain                   |          |
| C2          | unknown                      |          |
| C3          | unknown                      |          |
| C4          | CCA1 homodimerization domain |          |
| C5          | unknown                      |          |
| C6          | unknown                      |          |
| C7          | unknown                      |          |
| C8          | unknown                      |          |
| C9          | unknown                      |          |

C1~4 domain : common domains of LHY/CCA1 in land plant  
 C5~9 domain common domains of LHY/CCA1 in Angiosperm  
 Red boxes indicate CCA1 phosphorylation sites.

**Supplementary Table 2 C4 domain-like sequences in database**

| Gene name | Species                                | Classification         | Accession number/gene ID |
|-----------|----------------------------------------|------------------------|--------------------------|
| CCA1      | <i>Arabidopsis</i>                     | Eudicots/eurosid II    | At2g46830                |
| LHY       | <i>Brassica oleracea</i>               | Eudicots/eurosid II    | At1g01060                |
|           | <i>Gossypium hirsutum</i>              | Eudicots/eurosid II    | AM390288                 |
|           | <i>Poncirus trifoliata</i>             | Eudicots/eurosid II    | DW511768                 |
|           | <i>Citrus aurantium</i>                | Eudicots/eurosid II    | EY813527                 |
|           | <i>Citru sinensis</i>                  | Eudicots/eurosid II    | EY842696                 |
|           | <i>Carica papaya</i>                   | Eudicots/eurosid II    | EY655215                 |
|           | <i>Eucalyptus globulus</i>             | Eudicots/eurosid I     | EX259210                 |
|           | <i>Vitis vinifera</i>                  | Eudicots/rosids        | ES594501                 |
|           | <i>Fragaria vesca</i>                  | Eudicots/eurosid I     | GSVIVT00026185001        |
|           | <i>Prunus persica</i>                  | Eudicots/eurosid I     | DY668428                 |
|           |                                        | Eudicots/eurosid I     | BU048428                 |
|           |                                        | Eudicots/eurosid I     | DY640705                 |
|           | <i>Malus domestica</i>                 | Eudicots/eurosid I     | GO497876                 |
|           | <i>Castanea sativa</i>                 | Eudicots/eurosid I     | AY611029                 |
|           | <i>Cucumis melo</i>                    | Eudicots/eurosid I     | AM725612                 |
|           | <i>Pisum sativum</i>                   | Eudicots/eurosid I     | AY826730                 |
| GmLCL1    | <i>Glycine max</i>                     | Eudicots/eurosid I     | EU076433                 |
| GmLCL2    |                                        |                        | EU076434                 |
|           | <i>Medicago truncatula</i>             | Eudicots/eurosid I     | BI311517                 |
|           | <i>Phaseolus vulgaris</i>              | Eudicots/eurosid I     | AJ420902                 |
|           | <i>Populus euphratica</i>              | Eudicots/eurosid I     | AJ768814                 |
| PtLHY1    | <i>Populus trichocarpa</i>             | Eudicots/eurosid I     | *(Takata et al., 2009)   |
| PtLHY2    |                                        |                        | CV238604                 |
| PnLHY1    | <i>Populus nigra</i>                   | Eudicots/eurosid I     | AB429410                 |
| PnLHY2    |                                        |                        | AB429411                 |
|           | <i>Euphorbia esula</i>                 | Eudicots/eurosid I     | DV129915                 |
|           | <i>Manihot esculenta</i>               | Eudicots/eurosid I     | CK643975                 |
|           | <i>Ricinus communis</i>                | Eudicots/eurosid I     | EG658583                 |
|           | <i>Mesembryanthemum crystallinum</i>   | Eudicots/core Eudicots | AY371287                 |
|           | <i>Aquilegia formosa x A.pubescens</i> | Eudicots               | DR935954                 |
|           | <i>Nicotiana benthamiana</i>           | Eudicots/eausterid I   | EC917354                 |
|           | <i>Nicotiana tabacum</i>               | Eudicots/eausterid I   | EB450103                 |
|           | <i>Lycopersicon esculentum</i>         | Eudicots/eausterid I   | AI776709                 |
|           | <i>Mentha piperita</i>                 | Eudicots/asterids      | AW254718                 |
|           | <i>Coffea canephora</i>                | Eudicots/eausterid I   | DV690965                 |
|           | <i>Helianthus argophyllus</i>          | Eudicots/eausterid II  | EE611452                 |
|           | <i>Liriodendron tulipifera</i>         | MAGNLLIIDS             | DT581324                 |
|           | <i>Persea americana</i>                | MAGNLLIIDS             | FD503075                 |
|           | <i>Aristolochia fimbriata</i>          | MAGNLLIIDS             | FD750795                 |
|           | <i>Asparagus officinalis</i>           | Monocots               | CV291009                 |
| OsLHY     | <i>Oryza sativa</i>                    | Monocots               | Os08g0157600             |
|           | <i>Cenchrus ciliaris</i>               | Monocots               | EB658854                 |
|           | <i>Lolium multiflorum</i>              | Monocots               | AU247776                 |
|           | <i>Hordeum vulgare</i>                 | Monocots               | CD662835                 |
|           | <i>Triticum aestivum</i>               | Monocots               | CJ718789                 |
|           | <i>Agrostis capillaris</i>             | Monocots               | DV854668                 |
|           | <i>Saccharum officinarum</i>           | Monocots               | CA242688                 |
|           | <i>sorghum bicolor</i>                 | Monocots               | Sb07g003870              |
|           | <i>Panicum virgatum</i>                | Monocots               | FE628858                 |
|           | <i>Zea mays</i>                        | Monocots               | CF058782                 |
|           | <i>Zingiber officinale</i>             | Monocots               | DY347440                 |
|           | <i>Musa acuminata</i>                  | Monocots               | DN239789                 |
|           | <i>Elaeis guineensis</i>               | Monocots               | EL682537                 |
| LgLHY1    | <i>Lemna gibba</i>                     | Monocots               | BAD97870                 |
| LgLHY2    |                                        | Monocots               | BAD97871                 |
| LpLHY1    | <i>Lemna paucicostata</i>              | Monocots               | BAD97866                 |
| LpLHY2    |                                        | Monocots               | BAD97867                 |
|           | <i>Pinus pinaster</i>                  | Pinophyta              | CT577466                 |
|           | <i>Pinus taeda</i>                     | Pinophyta              | CF477745                 |
|           | <i>Selaginella moellendorffii</i>      | Pteridophyta           | FE499712                 |
| PpCCA1a   | <i>Physcomitrella patens</i>           | Bryophyta              | AB458831                 |
| PpCCA1b   |                                        |                        | AB458832                 |

**Supplementary Table 3 Primers used for constructs in this work**

| Primer name          | Sequence                                                 |
|----------------------|----------------------------------------------------------|
| Hd6-1F               | 5'-ATGTCGAAGGCGAGGGTCTA-3'                               |
| Hd6-tik-F2           | 5'-ACAATGTAAAATAGATCATGACCTCCGAA-3'                      |
| Hd6-R                | 5'-TTCGGAGGTCATGATCTATTTAACATTGT-3'                      |
| Hd6-tik-R2           | 5'-TCATTGTGGTCGTGCTCTGCTA-3'                             |
| FlagNF1              | 5'-CTCCGATTACAAGGATCATGATGGAGATTACAAGGATCATGATATTGATT-3' |
| FlagNF2              | 5'-AAAGATCTTAATTAAGCAACCATGGCTTCCTCCGATTACAA-3'          |
| FlagN1R1             | 5'-CGGGGGATCCCTTATCATCATCATCCTTGTAATCAATATCATGATCC-3'    |
| FlagN1R2             | 5'-TTGAGCTCCGGCGCGCCACTAGTGGGGTACCCCCGGGGGATCCCT-3'      |
| FlagN2R1             | 5'-CGGGGGATCCCTTATCATCATCATCCTTGTAATCAATATCATGATCC-3'    |
| FlagN2R2             | 5'-TTGAGCTCCGGCGCGCCACTAGTGGGGTACCCCCGGGGGATCCCT-3'      |
| FlagN3R1             | 5'-CGGGGGATCCCTTATCATCATCATCCTTGTAATCAATATCATGATCC-3'    |
| FlagN3R2             | 5'-TTGAGCTCCGGCGCGCCACTAGTGGGGTACCCCCGGGGGATCCCT-3'      |
| XbaI-strepII-BamHI-F | 5'-CGCGCCTTTTTCGAACTGCGGGTGGCTCCAGCTAGCCATTCTAG-3'       |
| XbaI-strepII-BamHI-R | 5'-AATGGCTAGCTGGAGCCACCCGCAGTTTCGAAAAGGCGCGGATC-3'       |
| OsLHY-Sal-F          | 5'-AAGTCGACTTGTATATTTCTTCTTTTCTTGAA-3'                   |
| CCA1-Sal-F           | 5'-AAGGTCGACAAGAGGAGCTTAGTGATGGA-3'                      |
| CCA1-R               | 5'-TGTAGCAGTGGTCTTGAAAAC-3'                              |
| CCA1-S>A-F           | 5'-TCCATGGAAGGCTGTGTCTGA-3'                              |
| CCA1-S>A-R           | 5'-ACACAGCCTTCCATGGATCGGTTATATT-3'                       |
| CCA1-S>E-F           | 5'-TCCATGGAAGGAAGTGTCTGA-3'                              |
| CCA1-S>E-R           | 5'-ACACTTCTTCCATGGATCGGTTATATT-3'                        |
| CCA1-56 7-S>A-F      | 5'-GTCGACATGGAGACAAATGCGGCTGGAG-3'                       |
| CCA1-S>AAA-F         | 5'-CACTCCGGCGGCTGCTGATGATGTTGAGGCGGAT-3'                 |
| CCA1-S>AAA-R         | 5'-CAGCAGCCCGCGGAGTGTGTTGAGCCACAC-3'                     |
| KpnI-OsPRR1pro-F     | 5'-AAAAAAGGTACCATCGCTAGAACAAGGGTCAC-3'                   |
| HindIII-OsPRR1ex2-R  | 5'-AAAAAGCTTTGCGATGTATTTGAGCATCTT-3'                     |
| mOsLHY-5,6S>A-F      | 5'-AAAAAAGTCGACTTGGGAATGGAGATTAATGCCGCTGGTG-3'           |
| mOsLHY-SSS-F         | 5'-GTTCCAACACACCGGCAGCTGCTGATATAGAAGCAGATA-3'            |
| mOsLHY-SSS-R         | 5'-TCTGCTTCTATATCAGCAGCTGCCGGTGTGTTGGAACCA-3'            |
| mOsLHY-600E>A-F      | 5'-TGATTCATGGAAGGCAGTTTCTGAAGA-3'                        |
| mOsLHY-600E>A-R      | 5'-TCTTCAGAAACGCTCTTCCATGAATCA-3'                        |
| OsLHY-NotI-R         | 5'-TTGCGGCCGCATCATGTCGATGCTTCGCT-3'                      |
| OsLHY-SpeI-R         | 5'-GGAAGTACTCCATCATGTCGATGCTTCGCT-3'                     |
| OsLHY-stopX-XhoI-R   | 5'-TTTCTCGAGCCATGTCGATGCTTCGCT-3'                        |
| XhoI-3FLAG-F         | 5'-TCGAGGGAGGTGGAGATTACAAGGATCATGATGGAGATTAT-3'          |
| XhoI-3FLAG-R         | 5'-CTTTATAATCTCCATCATGATCCTTGTAATCTCCACCTCCC-3'          |
| NotI-3FLAG-F         | 5'-AAAGATCATGATATTGATTACAAGGATGATGATGATAAGTAGC-3'        |
| NotI-3FLAG-R         | 5'-GCTACTTATCATCATCATCCTTGTAATCAATATCATGATCTTT-3'        |

**Supplementary Table 4 Primers and Taq-man probes for quantitative RT-PCR**

|                       |                                         |
|-----------------------|-----------------------------------------|
| OsLHY-1828F           | 5'-GGGTCGTCTGGCTTTTGTAT-3'              |
| OsLHY-2101R           | 5'-CGGTACCCTGTTCTCCTTC-3'               |
| OsLHY probe           | 5'-AAAGGAGATTAGCAAGGAGGAAGAAG-3'        |
| OsPRR1-56F            | 5'-ACCCATGTGTGGCGGC-3'                  |
| OsPRR1-129R           | 5'-GCCAACTCGAAATTGTCATTGAA-3'           |
| OsPRR1 probe          | 5'-CGGATGCTTGGTTTGTTCGGAGAAAAA-3'       |
| OsGI-2793F            | 5'-GCATAAGTTGTGGGTGCTTCC-3'             |
| OsGI-2842R            | 5'-GAAAATACGCAGCTGGTGGAG-3'             |
| OsGI-2870T probe      | 5'-AGATCCTCGGCTGTAAGTTGTTGGAGGC-3'      |
| RFT1-418F             | 5'-CGTCCATGGTGACCCAACA-3'               |
| RFT1-501R             | 5'-CCGGGTCTACCATCACGAGT-3'              |
| RFT1-452T probe       | 5'-CGGTGGCAATGACATGAGGACGTTC-3'         |
| Hd6(OsCKA2-1)-1193F   | 5'-TCACCAAGATAGGCTCACTGCA-3'            |
| Hd6(OsCKA2-1)-1343R   | 5'-CAAAGTAGTACCGTCGTGGATCAT-3'          |
| Hd6(OsCKA2-1)-T probe | 5'-TGGCACATCCGTTCTCTCCAAGTGAG-3'        |
| OsCKA2-2-1021F        | 5'-GGAAGGCACAGCAGGAAAC-3'               |
| OsCKA2-2-1247R        | 5'-TCCATGACTGCTGCTAATCG-3'              |
| OsCKA2-2 probe        | 5'-AGAACAGTAGGCCTCGTGCACAATAGACAAAAG-3' |
| OsCKA2-3-F            | 5'-CCACCATGACAGGCTGACC-3'               |
| OsCKA2-3-R            | 5'-TGCTGCCCTCACTTGTTCAA-3'              |
| OsCKA2-3 probe        | 5'-CTCGTGAAGCTATGGCGCATCCCTAC-3'        |
| OsCKA2-4-1164F        | 5'-GGAAAGGCCTACAGCAAAGGA-3'             |
| OsCKA2-4-1237R        | 5'-TCCTGCCGTTTTAAGTGCTTC-3'             |
| OsCKA2-4-1187T probe  | 5'-CCATGGCTCATCCATATTTCAATCCAGTG-3'     |
| OsPRR73-F             | 5'-GAGCAGTTGACTTTCTAGTGAAGCCT-3'        |
| OsPRR73-R             | 5'-TTCGGATGCCACTTTTCGCT-3'              |
| OsPRR73-Probe         | 5'-AGCATGTTTGGAGACGATGCCACAGTTAA-3'     |
| OsPRR95-F             | 5'-GCTGCAGATTTTCCTTGTTAAGCC-3'          |
| OsPRR95-R             | 5'-TGCTGCACATCAAGAACACCG-3'             |
| OsPRR95-Probe         | 5'-TGGCAGCATGTTTGGAGAAAACAACACTGTCC-3'  |
| OsPRR37-F             | 5'-CAGAAAAGGAAAGAGCGCAAC-3'             |
| OsPRR37-R             | 5'-CTGCTCGGCCAGCCTC-3'                  |
| OsPRR37-Probe         | 5'-TCGGAAAAAAGGTGCGGTACCAGAG-3'         |

1. **Saitou N & Nei M** (1987) The neighbor-joining method: A new method for reconstructing phylogenetic trees. *Molecular Biology and Evolution* **4**:406–425.
2. **Felsenstein J** (1985) Confidence limits on phylogenies: An approach using the bootstrap. *Evolution* **39**:783–791.
3. **Zuckermandl E & Pauling L** (1965) Evolutionary divergence and convergence in proteins, pp. 97–166 in *Evolving Genes and Proteins*, edited by V. Bryson and H.J. Vogel. Academic Press, New York.
4. **Tamura K, Dudley J, Nei M & Kumar S** (2007) MEGA4: Molecular Evolutionary Genetics Analysis (MEGA) software version 4.0. *Molecular Biology and Evolution* **24**:1596–1599.

5. **Crooks GE, Hon G, Chandonia JM, Brenner SE** (2004) WebLogo: A sequence logo generator. *Genome Research***14**:1188–1190.
